# Supplementary material for: Using a Quantitative High-Throughput Screening Platform to Identify Molecular Targets and Compounds as Repurposing Candidates for Endometriosis
Source: MDPI journal article supplement (doi:10.3390/biom13060965), 2023-06-08
Supplement: s1 [file s1]

## Supplementary Materials

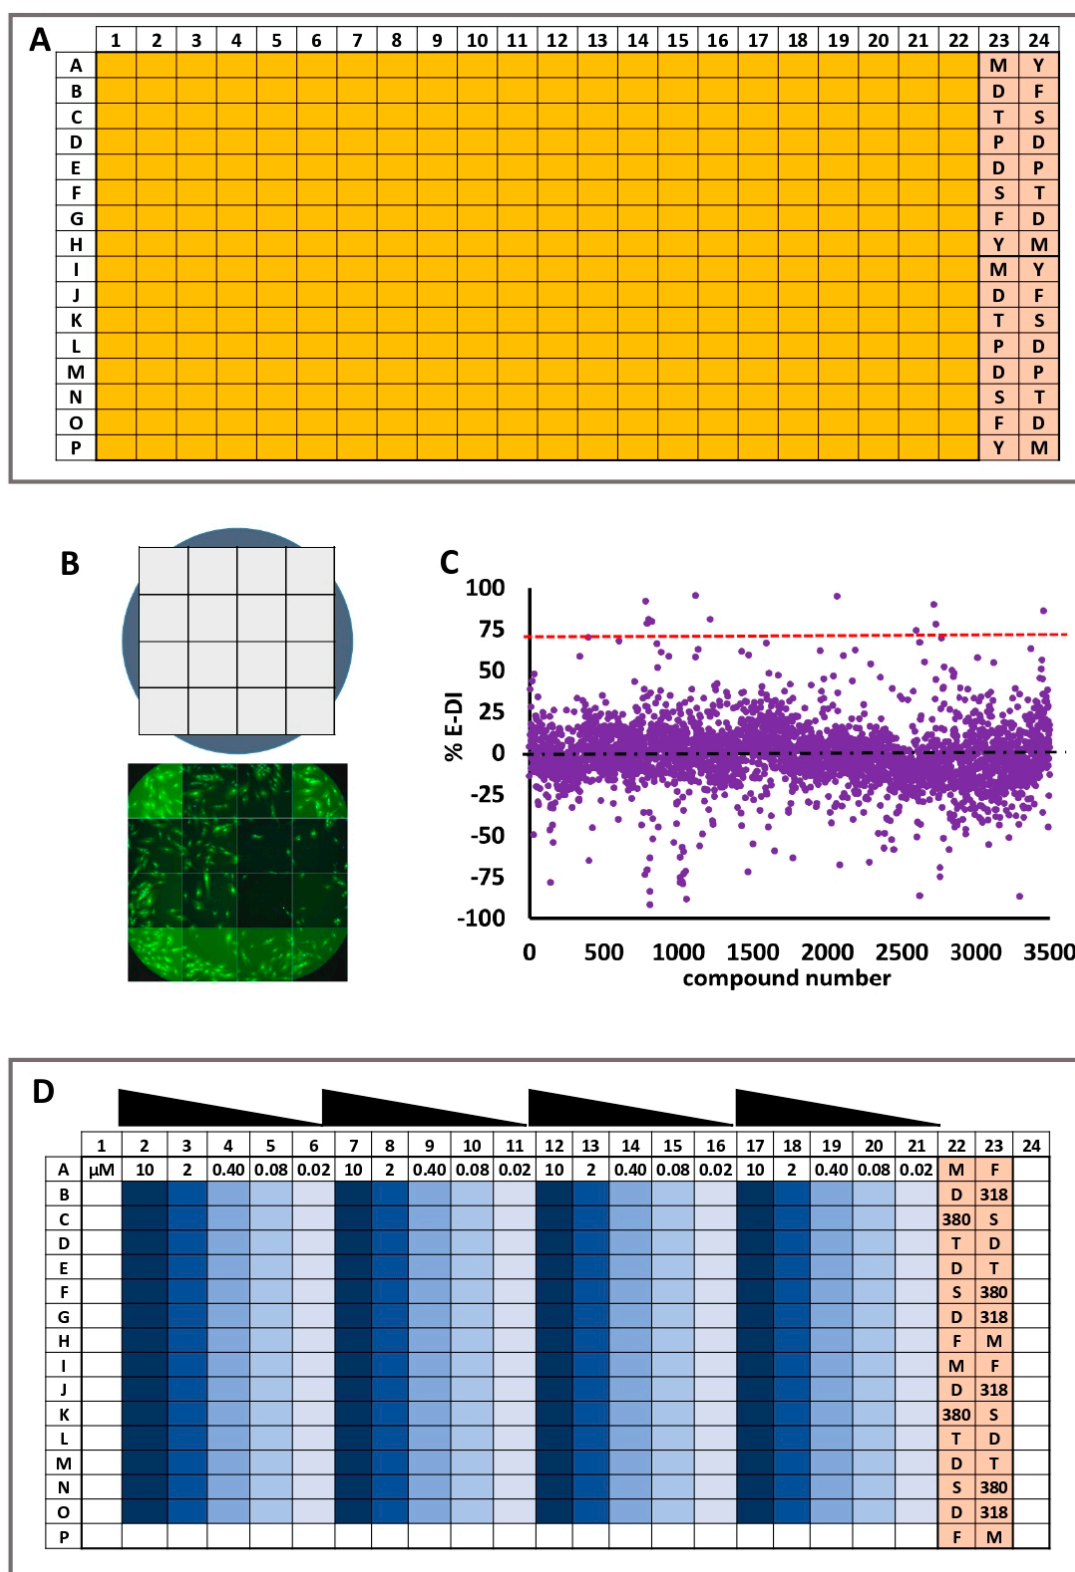

**Supplementary Figure S1:** Quantitative High Throughput Screening (qHTS) experimental set up. The initial qHTS consisted of a 384 well set up that included 352 wells containing a single compound [10 μM] and columns 23 and 24

contained randomly deposited QC compounds [10  $\mu$ M] (A). High Content Images (HCI) were taken using a 16-square array at 10X magnification to capture entire well (B). Cells stained green with CMFDA. The %E-DI compound response representation to show the large variability in cellular response to the compounds screened (C). Compounds above zero inhibited cell growth and compounds above 70% (red dotted line) were selected for further investigation. In the final qHTS, the hit confirmation consisted of a 384 well set up where a single compound was serially diluted 1:5 over 5 wells [10-0.02  $\mu$ M]. Column 22 and 23 contained a single dose of QC compounds [10  $\mu$ M] (D). QC compounds listed were media (M), DMSO (D), tamoxifen (T), fulvestrant (F), salinomycin (S), panobinostat (P), Y26732 (Y), SNO1006318 (318), SNO1004380 (380).

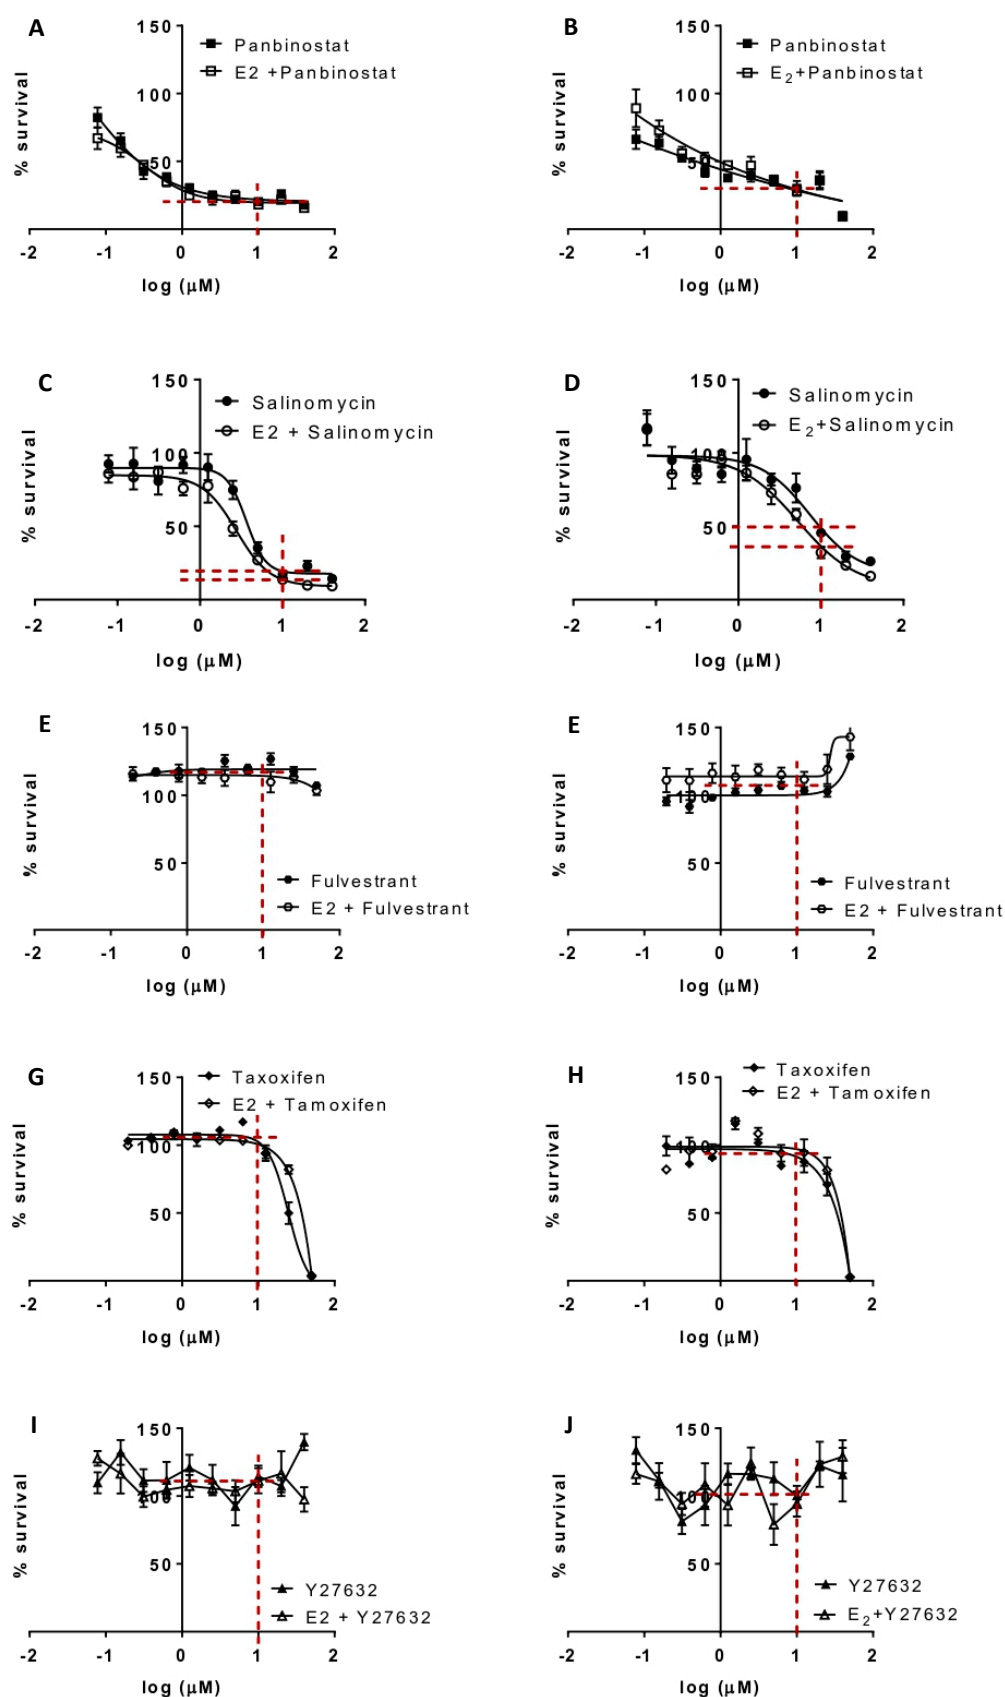

**Supplementary Figure S2:** Dose response curves for QC compounds. Panbinostat (A-B) salinomycin (C-D), fulvestrant (E-F), tamoxifen (G-H), Y27632 (I-J) inhibition or stimulus of 1455 (A, C, E, G, I) and 1458 (B, D, F, H, J) cell growth in a

dose dependent manner in both vehicle and estrogen conditions. The 10  $\mu\text{M}$  (log 1 $\mu\text{M}$ ) HTS compound concentration labelled with red dotted line to demonstrate the percentage of cell survival.

**Supplemental Table S1:** Z' factors and %CV for confirmation HTS.

|                          | 1455    |           | 1458    |           |
|--------------------------|---------|-----------|---------|-----------|
|                          | VEHICLE | ESTRADIOL | VEHICLE | ESTRADIOL |
|                          | Z'      | Z'        | Z'      | Z'        |
| <b>DMSO</b>              |         |           |         |           |
| PANOBINOSTAT             | 0.51    | 0.47      | 0.64    | 0.64      |
| SALINOMYCIN              | 0.50    | 0.46      | 0.54    | 0.58      |
| TAMOXIFEN                | 0.29    | 0.3       | 0.73    | 0.69      |
| <b>FULVESTRANT</b>       |         |           |         |           |
| PANOBINOSTAT             | 0.59    | 0.55      | 0.65    | 0.69      |
| SALINOMYCIN              | 0.58    | 0.54      | 0.55    | 0.64      |
| TAMOXIFEN                | 0.39    | 0.39      | 0.73    | 0.73      |
| <b>Y26732</b>            |         |           |         |           |
| PANOBINOSTAT             | 0.55    | 0.51      | 0.66    | 0.67      |
| SALINOMYCIN              | 0.55    | 0.50      | 0.58    | 0.63      |
| TAMOXIFEN                | 0.38    | 0.38      | 0.74    | 0.72      |
|                          | %CV     | %CV       | %CV     | %CV       |
| <b>Negative Controls</b> |         |           |         |           |
| DMSO                     | 9.05    | 10.23     | 7.43    | 7.23      |
| FULVESTRANT              | 7.70    | 8.62      | 7.44    | 5.90      |
| Y26732                   | 11.01   | 11.80     | 7.97    | 5.54      |
| <b>Positive Controls</b> |         |           |         |           |
| PANOBINOSTAT             | 17.35   | 16.22     | 18.53   | 22.31     |
| SALINOMYCIN              | 13.29   | 14.72     | 8.59    | 10.66     |
| TAMOXIFEN                | 19.69   | 24.64     | 27.74   | 19.29     |

**Supplemental Table S2:** Z' factors and %CV for confirmation HTS.

|                          | 1455    |           | 1458    |           |
|--------------------------|---------|-----------|---------|-----------|
|                          | VEHICLE | ESTRADIOL | VEHICLE | ESTRADIOL |
|                          | Z'      | Z'        | Z'      | Z'        |
| <b>DMSO</b>              |         |           |         |           |
| SALINOMYCIN              | 0.51    | 0.63      | 0.76    | 0.60      |
| <b>FULVESTRANT</b>       |         |           |         |           |
| SALINOMYCIN              | 0.43    | 0.53      | 0.70    | 0.64      |
| <b>SNO1004380</b>        |         |           |         |           |
| SALINOMYCIN              | 0.61    | 0.65      | 0.82    | 0.76      |
| <b>SNO1006318</b>        |         |           |         |           |
| SALINOMYCIN              | 0.74    | 0.67      | 0.65    | 0.62      |
|                          | %CV     | %CV       | %CV     | %CV       |
| <b>Negative Controls</b> |         |           |         |           |
| <b>DMSO</b>              | 10.07   | 8.19      | 5.44    | 9.04      |
| <b>FULVESTRANT</b>       | 12.24   | 11.00     | 6.72    | 7.45      |
| <b>SNO1004380</b>        | 7.14    | 7.69      | 2.85    | 4.73      |
| <b>SNO1006318</b>        | 3.13    | 6.86      | 7.89    | 9.09      |
| <b>Positive Control</b>  |         |           |         |           |
| <b>SALINOMYCIN</b>       | 15.64   | 16.97     | 16.67   | 6.57      |

**Supplemental Table S3:** Target genes identified from qHTS used for protein-protein-interaction

| 1455 only | 1458 only | Both Cell lines |
|-----------|-----------|-----------------|
| ABCB1     | ABCC4     | ADRA1           |
| ALB       | ABCC8     | ADRA1B          |
| CYP2D6    | ABCB11    | ADRA1D          |
| CYP3A4    | ACE       | AHRH1           |
| CYP3A5    | ACHE      | ATP4A           |
| HRH1      | ADRB1     | AR              |
| KCNH2     | ADRB2     | CACNA2D1        |
| NOS3      | ALB       | CCA             |
| PDG       | ANPEP     | CHRM1           |
|           | APEX1     | CHRM2           |
|           | AR        | CHRM3           |
|           | ATF6      | CHRM4           |
|           | CA1       | CHRM5           |
|           | CA2       | COX2            |
|           | CA9       | CYP1A2          |
|           | CA12      | CYP2C9          |
|           | CA14      | CYP2C19         |
|           | CASP1     | CYP2D6          |
|           | CASP2     | CYP3A4          |
|           | CASP3     | DDAH1           |
|           | CASP6     | DRD1            |
|           | CASP7     | DRD2            |
|           | CASP8     | DRD4            |
|           | CCNE1     | ESR1            |
|           | CCNE2     | GABA            |
|           | CDK2      | GABBR2          |
|           | CHRM1     | HRH1            |
|           | CHRM2     | HTR1A           |

|  |         |        |
|--|---------|--------|
|  | CHRM4   | HTR2A  |
|  | CHRM5   | HTR2C  |
|  | CSNK2A1 | IDH1   |
|  | CYP2C8  | IL1B   |
|  | CYP3A4  | ISP    |
|  | DRD3    | KCNMA1 |
|  | EGFR    | NTRK2  |
|  | EHMT1   | P53    |
|  | EHMT2   | SLC1A1 |
|  | ESR1    | SLC7A5 |
|  | ESRRA   | TNFA   |
|  | FBP1    | TRHR   |
|  | FOLH1   |        |
|  | FUCA1   |        |
|  | GAA     |        |
|  | GBA2    |        |
|  | GLB1    |        |
|  | GPR151  |        |
|  | HDAC6   |        |
|  | HIF1A   |        |
|  | HK1     |        |
|  | HK2     |        |
|  | HRH4    |        |
|  | HTR2A   |        |
|  | IGF1R   |        |
|  | KCNH2   |        |
|  | KCNJ1   |        |
|  | KCNMA1  |        |
|  | MAN2A1  |        |
|  | MAN2B1  |        |

|  |        |  |
|--|--------|--|
|  | MAPK1  |  |
|  | MGAM   |  |
|  | MME    |  |
|  | MTAP   |  |
|  | MTHFR  |  |
|  | NOS3   |  |
|  | NR1H4  |  |
|  | NR1I2  |  |
|  | NR3C1  |  |
|  | OGA    |  |
|  | OPRD1  |  |
|  | OPRK1  |  |
|  | PDE5A  |  |
|  | PDE6G  |  |
|  | PDE6H  |  |
|  | PDE10A |  |
|  | PDE11A |  |
|  | PIK3CG |  |
|  | PNP    |  |
|  | PPARA  |  |
|  | PPARD  |  |
|  | PPARG  |  |
|  | PTGES  |  |
|  | PYGL   |  |
|  | RAR    |  |
|  | RARA   |  |
|  | RHOB   |  |
|  | SELP   |  |
|  | SI     |  |
|  | SLC5A2 |  |



---

|  |         |  |
|--|---------|--|
|  | SLCO1B1 |  |
|  | SNAP25  |  |
|  | TSHR    |  |
|  | TTR     |  |
|  | UGCG    |  |
|  | YARS    |  |
